# Supplementary material
Source: PubMed Central journal article supplement (PMC7444932)

ID Persona:  
Cognome:  
Nome:  
Sesso: Maschio  
Nato il:  
Età: 55

Data Esame: 01/05/2020  
Ora Esame: 23:16:00  
Freq. Card.: 93 BPM  
PR int.: 92 ms  
Dur. QRS: 78 ms  
QT/QTc: 482 / 600 ms  
Assi P-R-T:  
N. Richiesta: 96532711-1-ADT

## EKG Alterations during propofol infusion

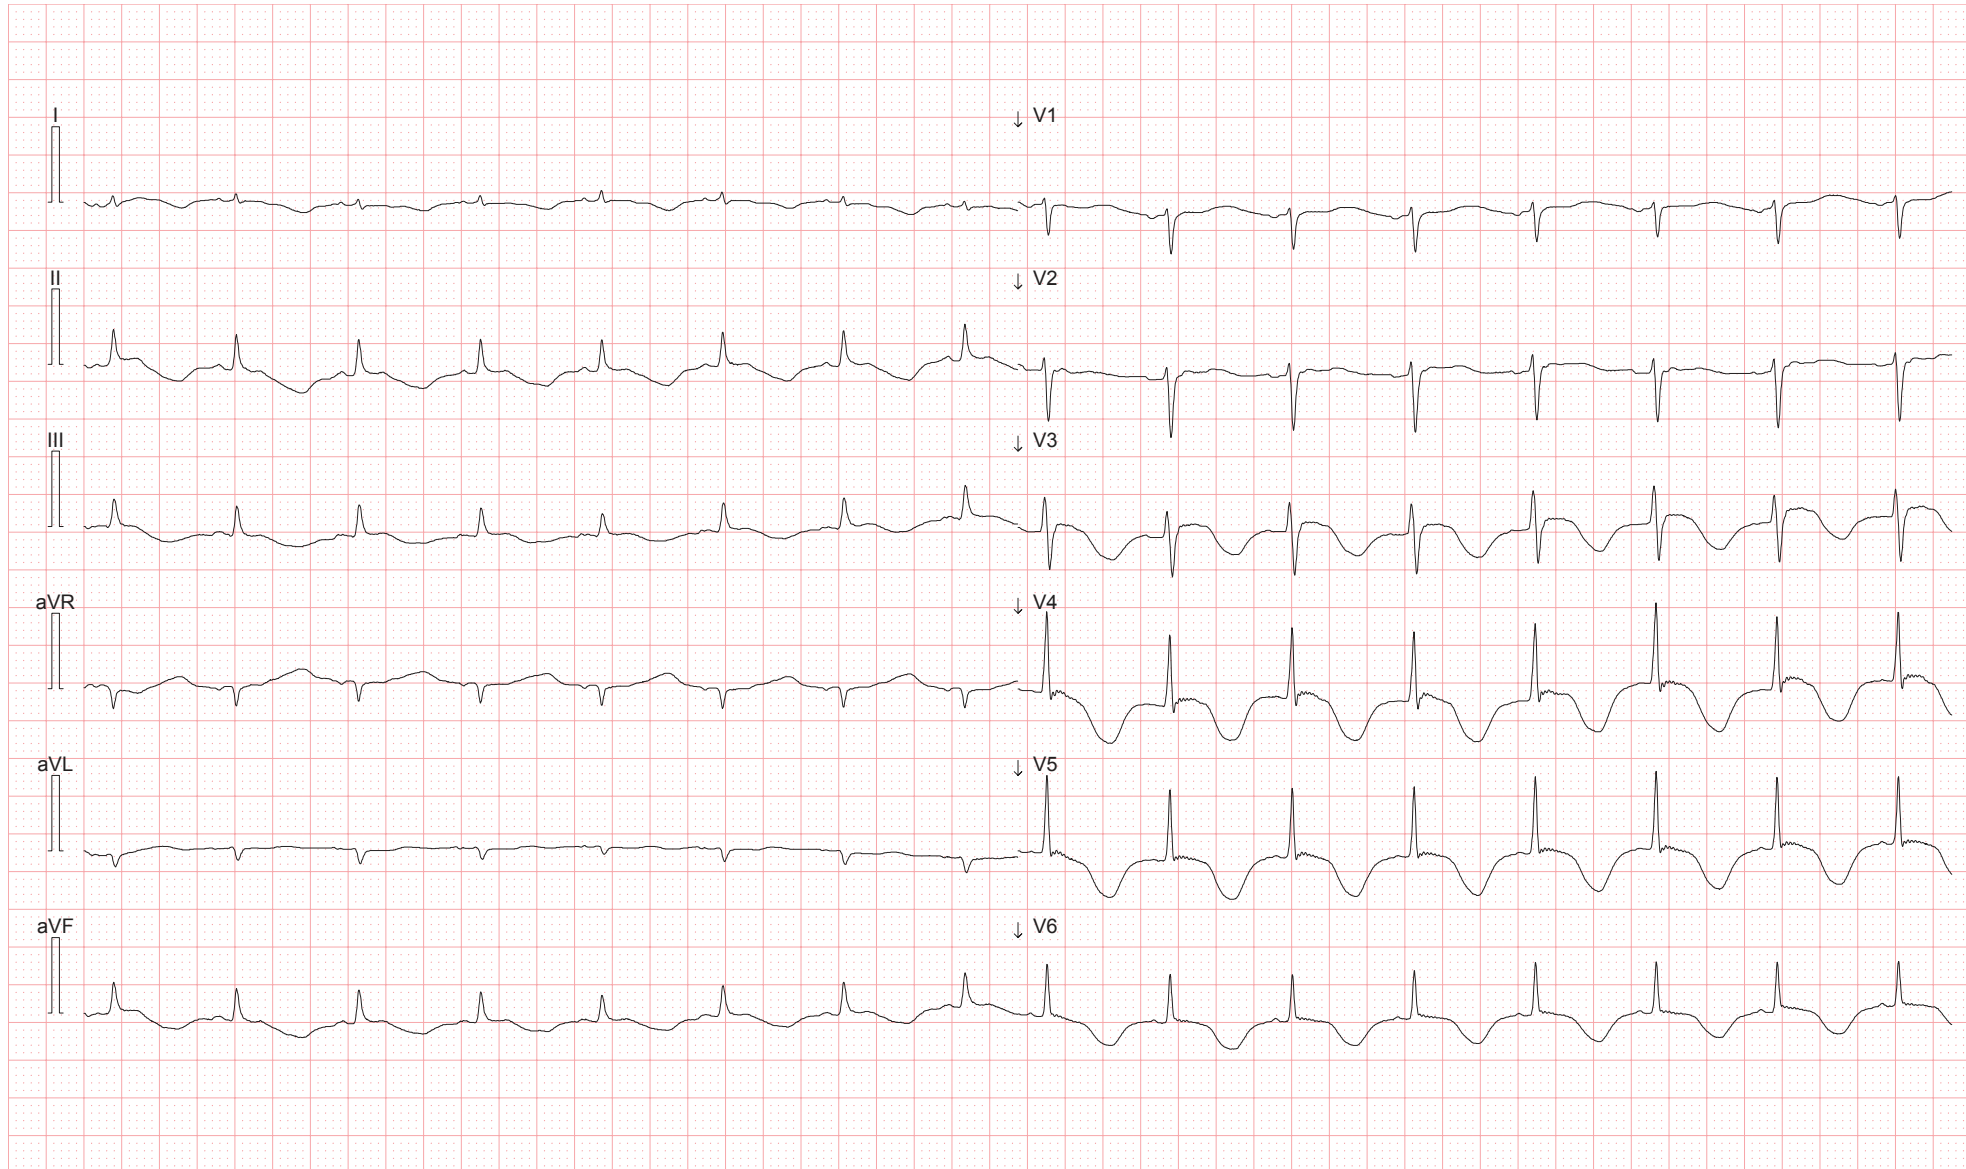

Supplement: mmc1.pdf [file mmc1.pdf]
